# Supplementary material for: The inhibition of the mitochondrial F1FO-ATPase activity when activated by Ca2+ opens new regulatory roles for NAD+
Source: publisher site journal article supplement (doi:10.1515/hsz-2017-0209), 2017-10-04
Supplement: Supplementary file 1 [file hsz-2017-0209_suppl.docx]

The inhibition of the mitochondrial F1FO-ATPase activity when activated by Ca2+ opens new regulatory roles for NAD+

Salvatore Nesci, Fabiana Trombetti, Vittoria Ventrella, Maurizio Pirini, Alessandra Pagliarani

**Supplementary data**


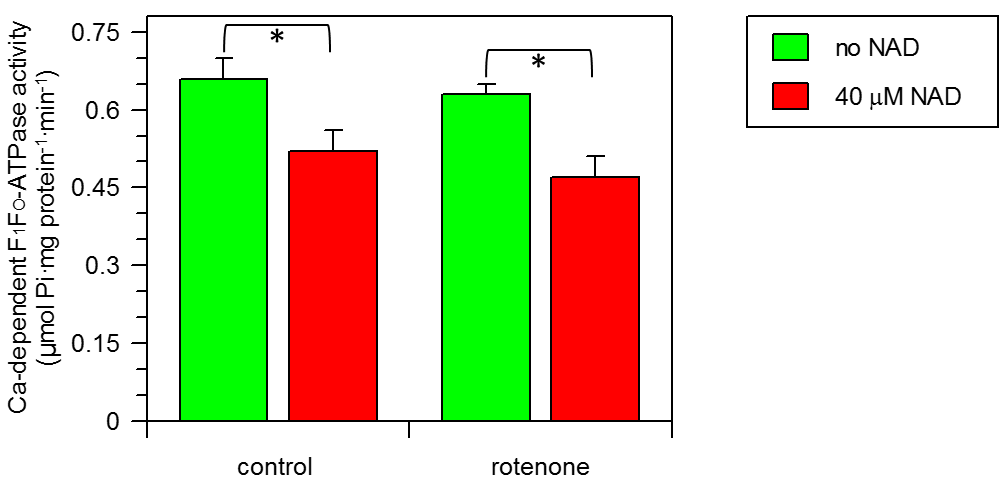


**Figure S1** Effect of NAD+ on the Ca2+-dependent F1FO-ATPase in absence and in presence of 2.5 μM rotenone. Data represent the mean ± SD (vertical bars) of three distinct experiments. * indicate significantly different values (*P*≤0.05), evaluated with one way ANOVA followed by SNK test.


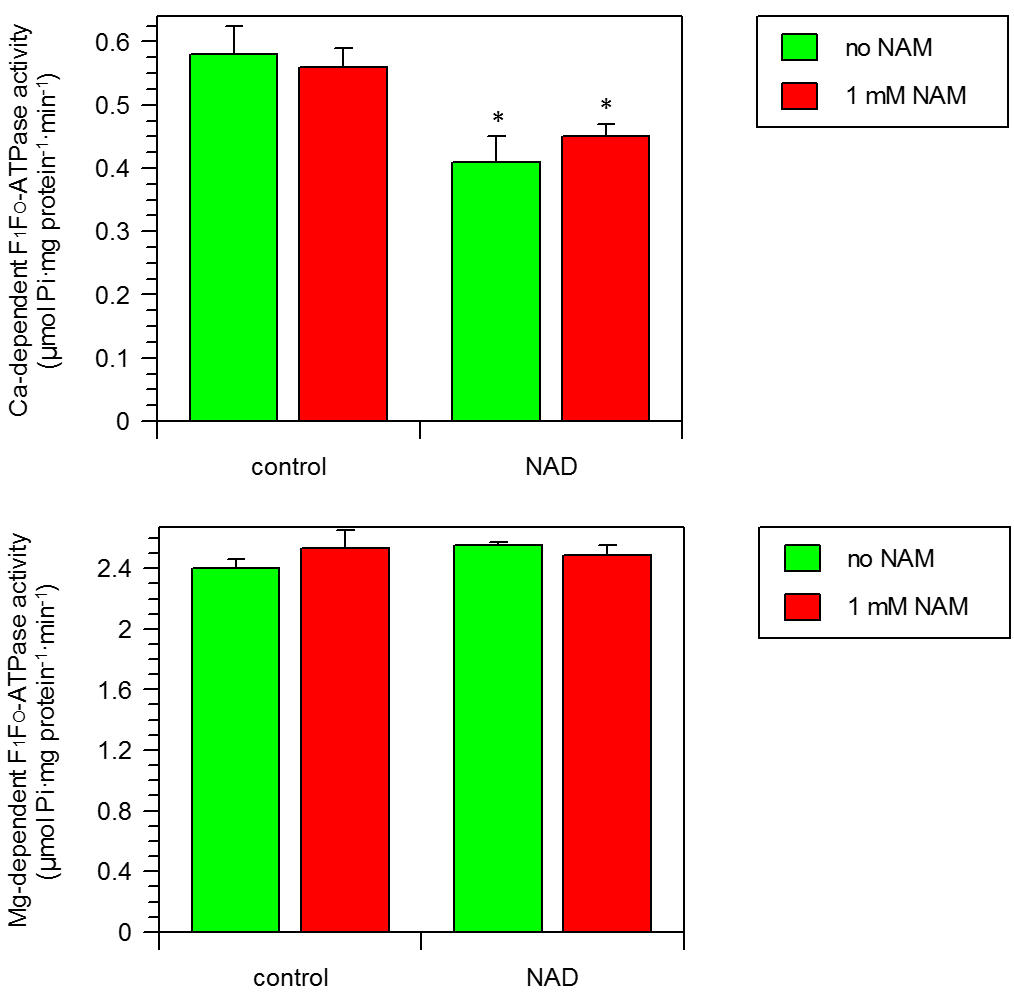


**Figure S2** Effect of 40 μM NAD+ on the Ca2+ and Mg2+-dependent F1FO-ATPase in absence and in presence of 1 mM nicotinamide (NAM). Data represent the mean ± SD (vertical bars) of three distinct experiments. * indicate significantly different values (*P*≤0.05) from control value without NAD+, evaluated with one way ANOVA followed by SNK test.
